# Supplementary material
Source: Springer Nature journal article supplement (https://www.springermedizin.de/resource/supplementary/12905_2005_91_MOESM6_ESM.pdf/9519042)

outcome measures

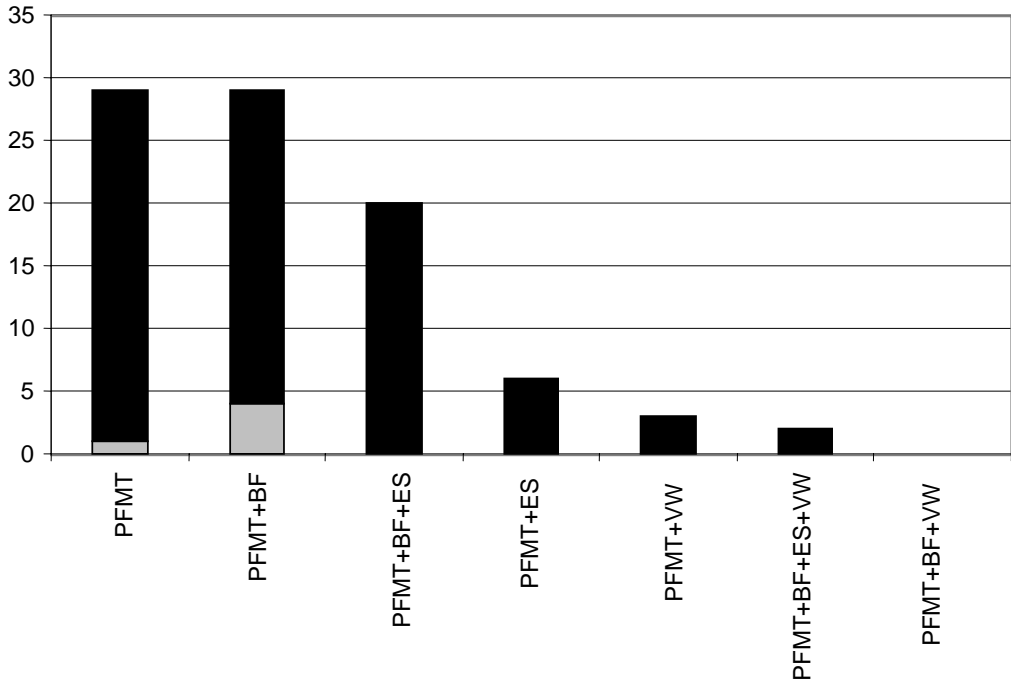

Supplement: MOESM6 [file 9519042]
